# Supplementary material for: Parameter optimization and yield prediction of cathode coating separation process for direct recycling of end-of-life lithium-ion batteries
Source: Royal Society of Chemistry journal article supplement (doi:10.1039/d1ra04086c), 2021-01-01
Supplement: d1ra04086c1.pdf [file d1ra04086c1.pdf]

## COMMUNICATION

### Parameter Optimization and Yield Prediction in Cathode Coating Separation Process for Direct Recycling of End-Of-Life Lithium-ion Batteries †

Liurui Li<sup>a</sup>, Tairan Yang<sup>a</sup> and Zheng Li<sup>\*a</sup>

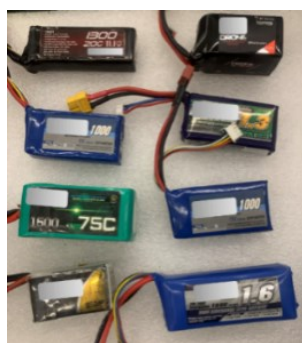

Figure S1. Battery modules disassembled for DOE

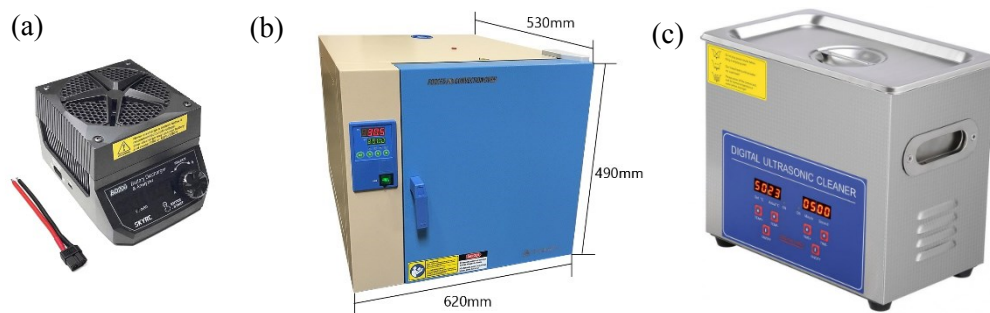

Figure S2. Equipment requirement (a) Battery module discharger, (b) High temperature oven and (c) Ultrasonic cleaner

Table S1. Plackett-Burman Screening Experiment Design and Result

| RunOrder | Soaking Media(A) | Soaking Time hour (B) | Soaking Temperature °C (C) | Sonicating Time min (D) | Sonicating Temperature °C (E) | Yield % (Y) |
|----------|------------------|-----------------------|----------------------------|-------------------------|-------------------------------|-------------|
| 1        | DMAC             | 3                     | 60                         | 10                      | 40                            | 63.7        |
| 2        | DMF              | 1                     | 90                         | 10                      | 40                            | 50.4        |
| 3        | DMAC             | 3                     | 90                         | 10                      | 60                            | 70.2        |
| 4        | DMF              | 1                     | 60                         | 10                      | 60                            | 52.6        |
| 5        | DMAC             | 1                     | 60                         | 10                      | 40                            | 49.5        |
| 6        | DMF              | 3                     | 60                         | 20                      | 60                            | 61.7        |
| 7        | DMF              | 1                     | 90                         | 20                      | 40                            | 75.2        |
| 8        | DMAC             | 3                     | 90                         | 20                      | 40                            | 95.1        |
| 9        | DMF              | 3                     | 90                         | 10                      | 60                            | 64.9        |
| 10       | DMF              | 3                     | 60                         | 20                      | 40                            | 80.3        |
| 11       | DMAC             | 1                     | 60                         | 20                      | 60                            | 93.4        |
| 12       | DMAC             | 1                     | 90                         | 20                      | 60                            | 90.2        |

Table S2. Analysis of Variance of Screening Experiment

| Source | DF | Adj SS  | Adj MS  | F-Value | P-Value |
|--------|----|---------|---------|---------|---------|
| A      | 1  | 494.08  | 494.08  | 6.27    | 0.046   |
| B      | 1  | 50.43   | 50.43   | 0.64    | 0.454   |
| C      | 1  | 167.25  | 167.25  | 2.12    | 0.195   |
| D      | 1  | 1742.43 | 1742.43 | 22.12   | 0.003   |
| E      | 1  | 29.45   | 29.45   | 0.37    | 0.563   |
| Error  | 6  | 472.57  | 78.76   |         |         |
| Total  | 11 | 2956.22 |         |         |         |

Table S3. Pre-set Process Parameters

| Parameters | Soaking Media | Soaking Time | Soaking Temperature | Sonicating Temperature | Sonicating Frequency |
|------------|---------------|--------------|---------------------|------------------------|----------------------|
| Unit       | NA            | Hour         | °C                  | °C                     | kHz                  |
| Level      | DMAC          | 5            | 90                  | 60                     | 40                   |

Table S4. Taguchi L16 (4<sup>3</sup>) Orthogonal Array

| RunOrder | Sonication time(A) | Sheet Size(B) | Solid-liquid Ratio(C) | Yield(Y) |
|----------|--------------------|---------------|-----------------------|----------|
| 1        | 1                  | 0.52312       | 5                     | 25.4     |
| 2        | 1                  | 1.04625       | 10                    | 23.5     |
| 3        | 1                  | 2.09250       | 15                    | 21.9     |
| 4        | 1                  | 4.18500       | 20                    | 23.0     |
| 5        | 3                  | 0.52312       | 10                    | 30.8     |
| 6        | 3                  | 1.04625       | 5                     | 36.4     |
| 7        | 3                  | 2.09250       | 20                    | 31.2     |
| 8        | 3                  | 4.18500       | 15                    | 39.7     |
| 9        | 5                  | 0.52312       | 15                    | 37.8     |
| 10       | 5                  | 1.04625       | 20                    | 34.2     |
| 11       | 5                  | 2.09250       | 5                     | 57.9     |
| 12       | 5                  | 4.18500       | 10                    | 51.7     |
| 13       | 7                  | 0.52312       | 50                    | 52.3     |
| 14       | 7                  | 1.04625       | 15                    | 60.9     |
| 15       | 7                  | 2.09250       | 10                    | 69.8     |
| 16       | 7                  | 4.18500       | 5                     | 79.9     |

Table S5. Taguchi Experiment Analysis of Variance for S/N Ratio

| Source | DF | Seq SS  | Adj SS  | Adj MS  | F-Value | P-Value | P% Contribution |
|--------|----|---------|---------|---------|---------|---------|-----------------|
| A      | 3  | 166.807 | 166.807 | 55.6023 | 155.43  | 0.000   | 86.55           |
| B      | 3  | 9.443   | 9.443   | 3.1478  | 8.8     | 0.013   | 4.90            |
| C      | 3  | 14.343  | 14.343  | 4.7810  | 13.36   | 0.005   | 7.44            |
| Error  | 6  | 2.146   | 2.146   | 0.3577  |         |         | 1.11            |
| Total  | 15 | 192.74  |         |         |         |         | 100             |

DF: degrees of freedom; Seq SS: sequential sum of squares; Adj SS: adjusted sum of squares; Adj MS: adjusted mean squares.

Table S6. Regression Analysis Verification Tests

| Experiment No. | Sonication Time | Sheet Size | Solid-liquid Ratio | Predicted Value(%) | Experiment Value(%) | Error(%) |
|----------------|-----------------|------------|--------------------|--------------------|---------------------|----------|
| 1              | 3               | 0.523      | 15                 | 28.26              | 26.75               | 5.36     |
| 2              | 5               | 1.485      | 10                 | 58.58              | 58.99               | 0.22     |
| 3              | 7               | 2.092      | 5                  | 70.56              | 73.73               | 4.49     |
